# Supplementary material
Source: Royal Society of Chemistry journal article supplement (doi:10.1039/d6se00273k)
Supplement: d6se00273k1.pdf [file d6se00273k1.pdf]

## Supporting Information

### **In Situ Constructed Ni<sub>3</sub>S<sub>2</sub>/CoMo<sub>2</sub>S<sub>4</sub> Heterointerface on Nickel Foam for Efficient Bifunctional Water Splitting**

Baoling Zou<sup>a</sup>, Fozia Sultana<sup>a</sup>, Qiurong Wang<sup>a</sup>, Renkun Li<sup>a</sup>, Ting Xiao<sup>a</sup>, Xiaojing Liu<sup>a</sup>,  
Tongtong Li<sup>b,\*</sup>, Renhong Li<sup>a,\*</sup>

<sup>a</sup> State Key Laboratory of Bio-based Fiber Materials, Zhejiang Sci-Tech University,  
Hangzhou, 310018, China

<sup>b</sup> Department of Materials Science & Engineering, Zhejiang Sci-Tech University,  
Hangzhou, 310018, China

\*Corresponding author.

E-mail addresses: lirenhong@zstu.edu.cn (R. Li), yitaji@zstu.edu.cn (T. Li)

## Characterization

The crystal structures were analyzed by X-ray diffraction (XRD, Shimadzu XRD-6100) using Cu K $\alpha$  radiation ( $\lambda = 1.5418 \text{ \AA}$ ) over a  $2\theta$  range of 5–90°. The morphology was examined using field-emission scanning electron microscopy (FE-SEM, ZEISS Ultra Plus). Detailed microstructural information was obtained using transmission electron microscopy (TEM) and high-resolution TEM (HRTEM, JEOL EM002B). Elemental distribution was analyzed by energy-dispersive X-ray spectroscopy (EDS) attached to the TEM. Surface chemical states and elemental composition were characterized by X-ray photoelectron spectroscopy (XPS, JEOL JPS-9010MC). All binding energies were calibrated with respect to the C 1s peak at 284.8 eV. The bulk elemental composition was quantified by inductively coupled plasma optical emission spectrometry (ICP-OES, Agilent) to determine the metal stoichiometry.

## Electrochemical measurements

All electrochemical measurements performed on a CHI660E electrochemical workstation (Shanghai Chenhua) using a standard three-electrode configuration. The as-prepared catalyst grown in situ on nickel foam (NF) served directly as the working electrode, with an average mass loading of  $\sim 3.0 \text{ mg}$ . A Hg/HgO electrode and a carbon rod were used as the reference and counter electrodes, respectively.

All measurements were conducted in 1.0 M KOH electrolyte at room temperature. Prior to testing, the electrolyte was purged with N<sub>2</sub> for 30 min to remove dissolved gases. Continuous stirring was applied during measurements to facilitate bubble release and prevent blockage of active sites. The OER and HER activities were evaluated by linear sweep voltammetry (LSV) at a scan rate of 5 mV s<sup>-1</sup>. All polarization curves were corrected with 90% iR compensation. Tafel slopes were derived from the Tafel equation:

$$\eta = a + b \cdot \log j \quad (1)$$

where  $\eta$  is the overpotential,  $j$  is the current density, and  $b$  represents the Tafel slope.

Electrochemical impedance spectroscopy (EIS) was conducted in the frequency range of 0.01–10<sup>5</sup> Hz with an amplitude of 5 mV. The electrochemical double-layer capacitance ( $C_{dl}$ ) was determined from cyclic voltammetry (CV) curves recorded in the non-faradaic region (1.0–1.1 V vs. RHE) at scan rates of 20, 40, 60, 80, and 100 mV s<sup>-1</sup>. The electrochemically active surface area (ECSA) was estimated according to:

$$ECSA = C_{dl}/C_s \quad (2)$$

where  $C_s$  represents the specific capacitance.

For stability evaluation, chronopotentiometry was performed in 1.0 M KOH at current densities of 50 mA cm<sup>-2</sup> for OER and 10 mA cm<sup>-2</sup> for HER. Additionally, 2000 cyclic voltammetry (CV) cycles were conducted at 100 mV s<sup>-1</sup>, followed by LSV measurements to assess activity retention. Prior to formal testing, the electrodes were activated by 20 CV cycles at 20 mV s<sup>-1</sup>.

All potentials were converted to the reversible hydrogen electrode (RHE) using:

$$E_{RHE} = E_{Hg/HgO} + 0.059 \times pH + 0.098 \quad (3)$$

The overpotential ( $\eta$ ) for OER was calculated as:

$$\eta = E_{RHE} - 1.23 \quad (4)$$

The mass activity (MA) (mA mg<sup>-1</sup>) at a given overpotential was obtained by:

$$MA = j/m_s \quad (5)$$

Where  $j$  is the current density (A cm<sup>2</sup>), and  $m_s$  is the total catalyst mass on the electrode (g cm<sup>2</sup>)

The intrinsic catalytic activity of catalysts was assessed by calculating turnover frequency (TOF), defined as:

$$TOF = (A \cdot j) / (4 \cdot F \cdot m) \quad (6)$$

where  $A$  is the geometric surface area (cm<sup>2</sup>) of the electrode,  $j$  is the current density (A cm<sup>-2</sup>),  $F$  is the Faraday constant (96485 C. mol<sup>-1</sup>), and  $m$  is molar quantity of electrochemically active sites (mol). The factor of 4 corresponds to the four-electron transfer required for the evolution of one O<sub>2</sub> molecule during the oxygen evolution reaction.

The number of active sites ( $m$ ) was estimated from CV data by analyzing the linear dependence of anodic peak current ( $i_a$ ) on scan rate ( $v$ ), assuming a surface-controlled one-electron redox process ( $n=1$ ). The relationship is described as:

$$\text{Slope} = (n^2 * F^2 * m) / (4 * R * T)$$

where  $R$  is the gas constant ( $8.314 \text{ J mol}^{-1} \text{ K}^{-1}$ ) and  $T$  is the absolute temperature (K).

The Faradaic efficiency (FE) for  $\text{H}_2$  and  $\text{O}_2$  evolution was calculated by:

$$\text{FE} = V_{\text{theo}} / V_{\text{exp}}$$

where  $V_{\text{theo}}$  and the  $V_{\text{exp}}$  are the experimentally measured and theoretically calculated gas volumes (mL), respectively. The theoretical gas volume was obtained from:

$$V_{\text{theo}} = V_m * Q / (n * F)$$

where  $V_m$  is the molar volume of an ideal gas at standard conditions ( $22.4 \text{ L mol}^{-1}$ ),  $Q$  is the total charge passed (C),  $n$  is the number of electrons involved in the reaction ( $n = 4$  for OER;  $n = 2$  for HER), and  $F$  is the Faraday constant ( $96485 \text{ C mol}^{-1}$ ).

## Computational details

All the calculations were performed in the framework of the density functional theory with the projector augmented plane-wave method, as implemented in the VASP.<sup>1</sup> The generalized gradient approximation proposed by Perdew, Burke, and Ernzerhof was selected for the exchange-correlation potential.<sup>2</sup> The van der Waals interaction was described by the DFT-D3 approach.<sup>3</sup> The cut-off energy for plane wave was set to 400 eV. The energy criterion was set to  $10^{-5}$  eV in iterative solution of the Kohn-Sham equation. A vacuum layer of 15 Å was added perpendicular to the sheet to avoid artificial interaction between periodic images. The Brillouin zone integration was performed using a  $2 * 2 * 1$  K-mesh. All the structures were relaxed until the residual forces on the atoms have declined to less than  $0.02 \text{ eV}/\text{Å}$ . Based on the XRD data, we used the structures of xxx with lattice constant  $\text{Ni}_3\text{S}_2$  and  $\text{CoMo}_2\text{S}_4$  with lattice constant  $\text{Ni}_3\text{S}_2/\text{CoMo}_2\text{S}_4$  as the catalyst crystal structures, respectively.

The lattice constant information is as follows:

| Ni <sub>9</sub> S <sub>6</sub> |                         | Co <sub>2</sub> Mo <sub>4</sub> S <sub>8</sub> |                        |
|--------------------------------|-------------------------|------------------------------------------------|------------------------|
| Space Group: P 1 (#1-1)        |                         | Space Group: P 1 (#1-1)                        |                        |
| a= 5.67382                     | $\alpha=90.0000^\circ$  | a= 12.39623                                    | $\alpha=90.0000^\circ$ |
| b= 5.67382                     | $\beta=90.0000^\circ$   | b= 3.20733                                     | $\beta=114.8357^\circ$ |
| c= 7.04707                     | $\gamma=120.0000^\circ$ | c= 5.93825                                     | $\gamma=90.0000^\circ$ |

In addition, to evaluate the HER and OER activity, the Gibbs free energy of intermediate adsorbed on catalyst was considered and the calculation method follows our previously published works.<sup>4</sup>

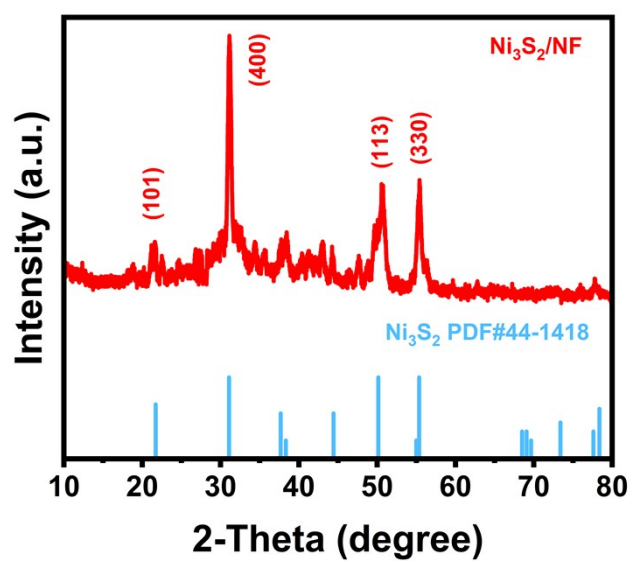

Figure S1. XRD pattern of Ni<sub>3</sub>S<sub>2</sub>/NF.

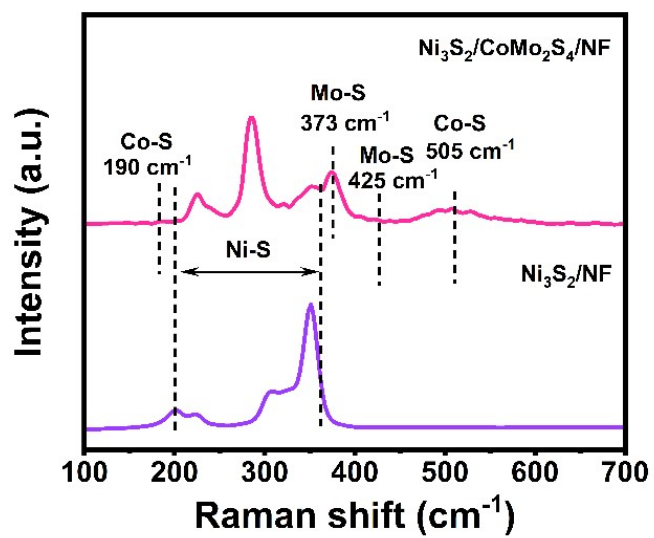

Figure S2. Raman spectra of  $\text{Ni}_3\text{S}_2/\text{CoMo}_2\text{S}_4/\text{NF}$ ,  $\text{Ni}_3\text{S}_2/\text{NF}$ .

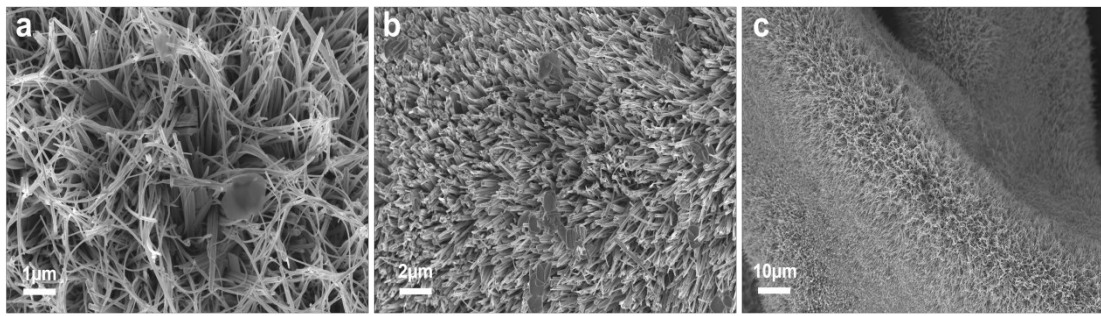

**Figure S3.** SEM images of  $\text{Ni}_3\text{S}_2/\text{CoMo}_2\text{S}_4/\text{NF}$ .

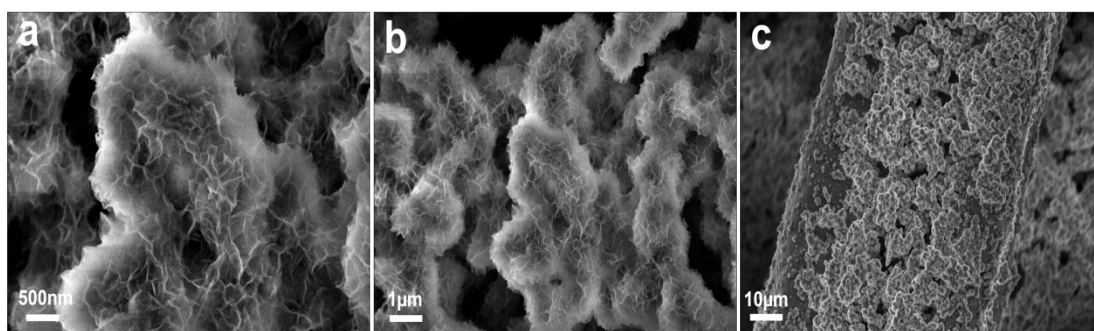

**Figure S4.** SEM images of Ni<sub>3</sub>S<sub>2</sub>/NF.

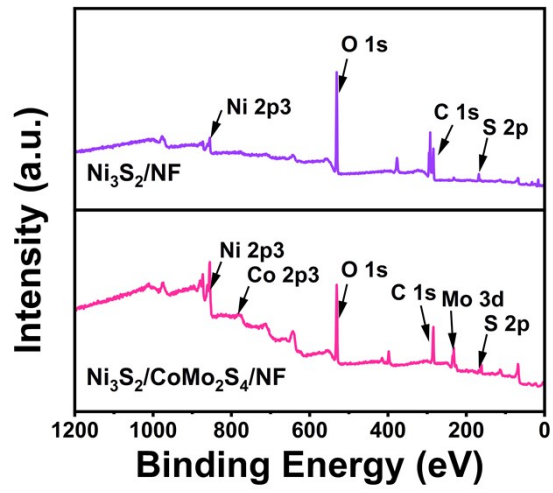

**Figure S5.** XPS core level spectra of Ni<sub>3</sub>S<sub>2</sub>/CoMo<sub>2</sub>S<sub>4</sub>/NF, and Ni<sub>3</sub>S<sub>2</sub>/NF.

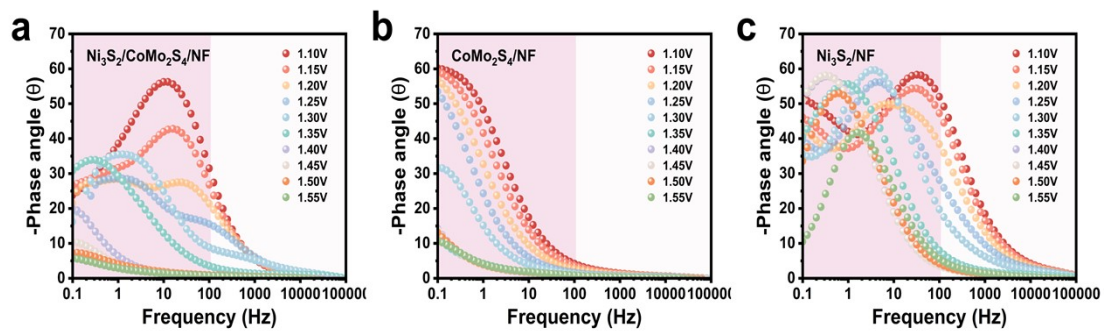

**Figure S6.** Bode plots of  $\text{Ni}_3\text{S}_2/\text{CoMo}_2\text{S}_4/\text{NF}$ ,  $\text{CoMo}_2\text{S}_4/\text{NF}$  and  $\text{Ni}_3\text{S}_2/\text{NF}$  recorded at different potentials during the OER.

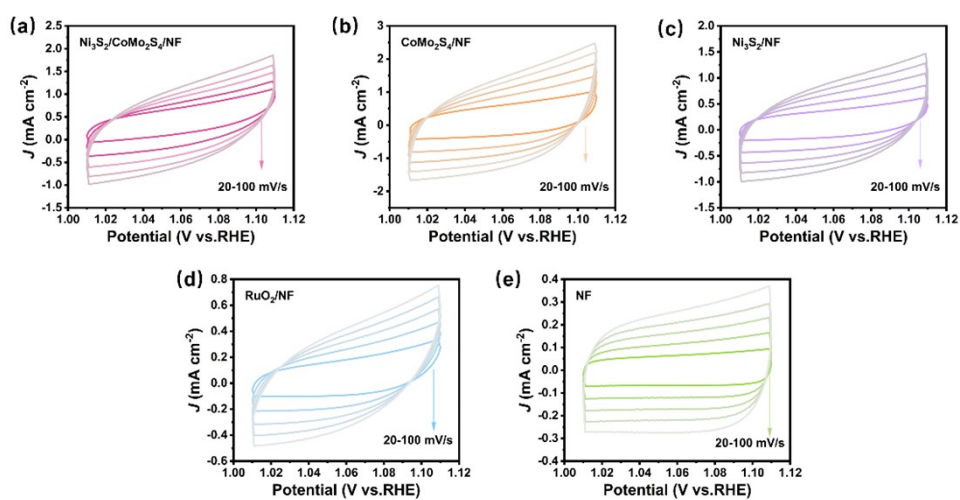

**Figure S7.** Cyclic voltammetry (CV) curves of (a)  $\text{Ni}_3\text{S}_2/\text{CoMo}_2\text{S}_4/\text{NF}$ , (b)  $\text{CoMo}_2\text{S}_4/\text{NF}$ , (c)  $\text{Ni}_3\text{S}_2/\text{NF}$ , (d)  $\text{RuO}_2/\text{NF}$ , and (e)  $\text{NF}$  recorded at scan rates ranging from 20 to 100  $\text{mV s}^{-1}$ .

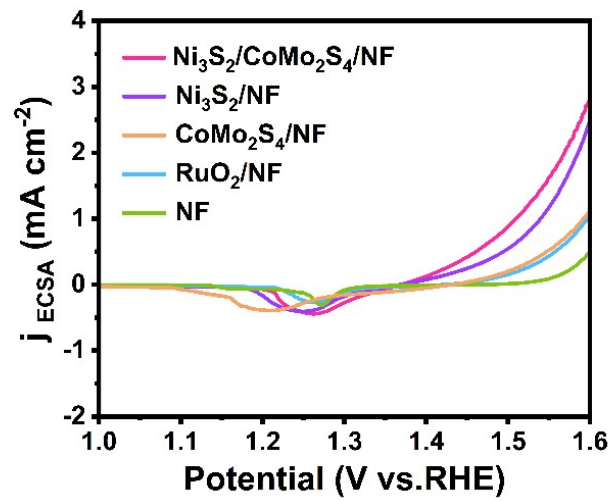

Figure S8. LSV curves normalized by ECSA.

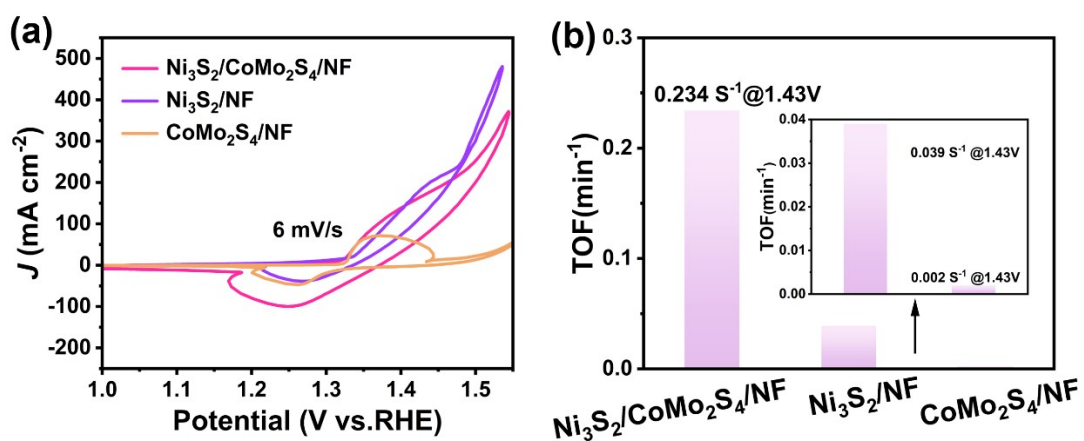

**Figure S9.** (a) Cyclic voltammetry (CV) curves of Ni<sub>3</sub>S<sub>2</sub>/CoMo<sub>2</sub>S<sub>4</sub>/NF, CoMo<sub>2</sub>S<sub>4</sub>/NF and Ni<sub>3</sub>S<sub>2</sub>/NF, (b) TOF of Ni<sub>3</sub>S<sub>2</sub>/CoMo<sub>2</sub>S<sub>4</sub>/NF, CoMo<sub>2</sub>S<sub>4</sub>/NF and Ni<sub>3</sub>S<sub>2</sub>/NF at 6 mV/s.

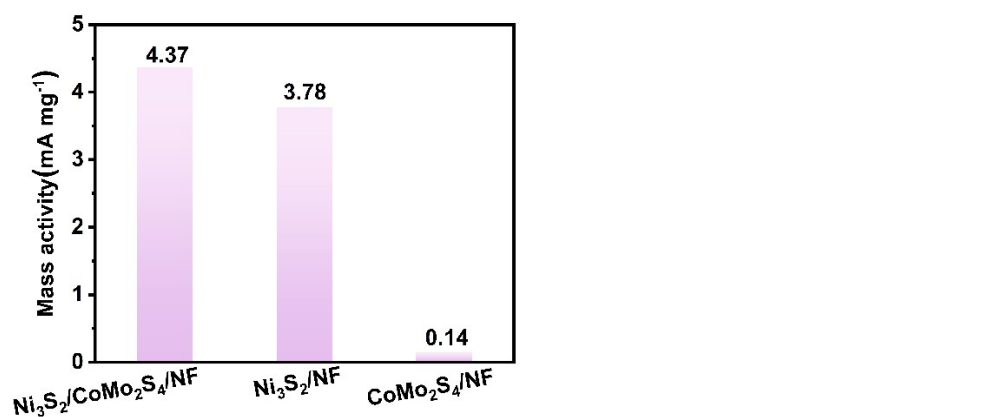

**Figure S10.** Mass activity of Ni<sub>3</sub>S<sub>2</sub>/CoMo<sub>2</sub>S<sub>4</sub>/NF, CoMo<sub>2</sub>S<sub>4</sub>/NF and Ni<sub>3</sub>S<sub>2</sub>/NF.

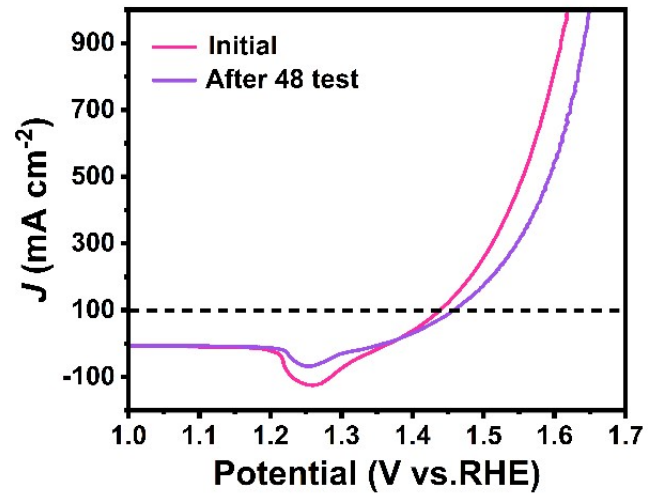

Figure S11. Polarization curves recorded after 48 test.

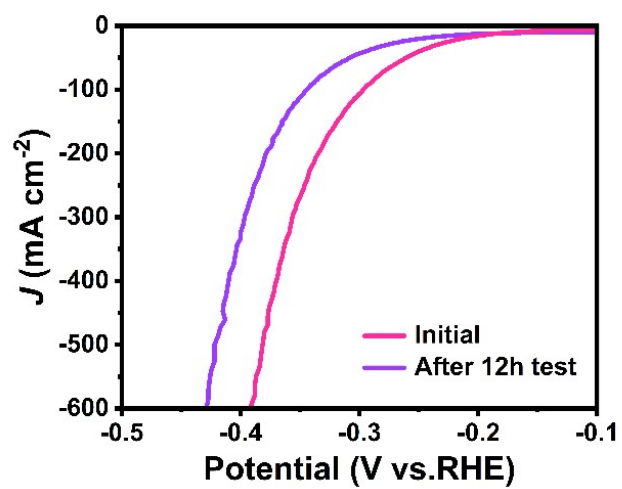

Figure S12. Polarization curves recorded after 12 test.

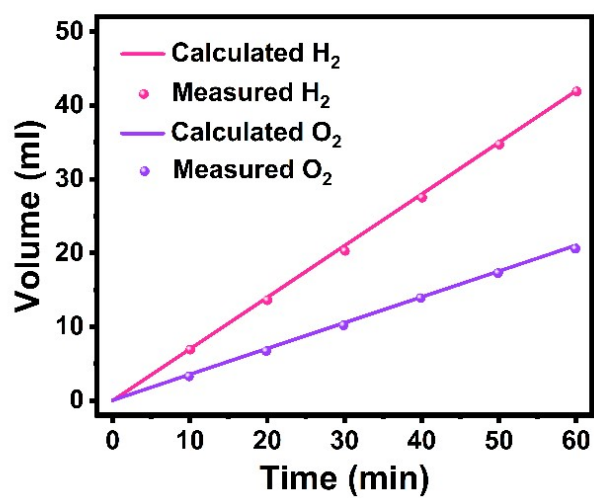

**Figure S13.** Experimental and theoretical H<sub>2</sub>/O<sub>2</sub> gas volumes generated within 1 h at 100 mA cm<sup>-2</sup>.

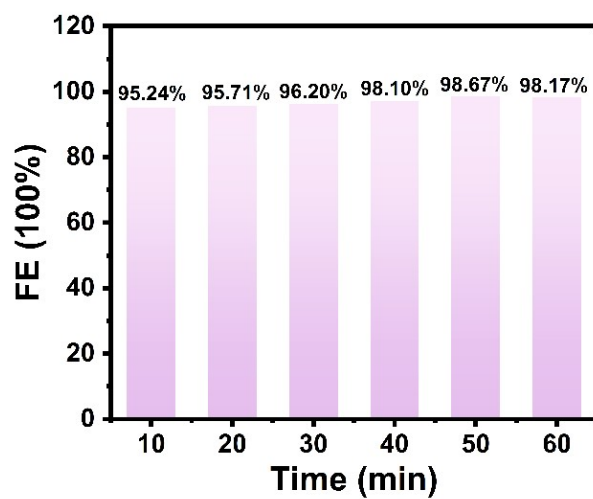

**Figure S14.** Faraday efficiency values of the Ni<sub>3</sub>S<sub>2</sub>/CoMo<sub>2</sub>S<sub>4</sub>/NF at different time periods.

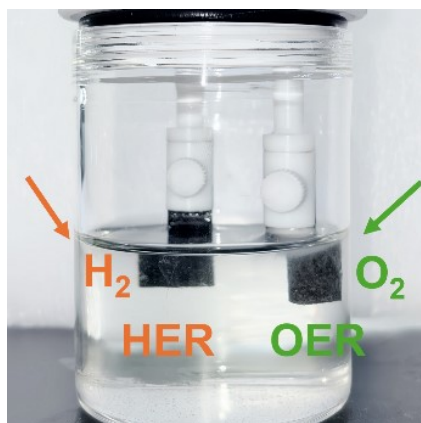

**Figure S15.** Photograph of the two-electrode electrochemical cell and the corresponding electrodes.

b

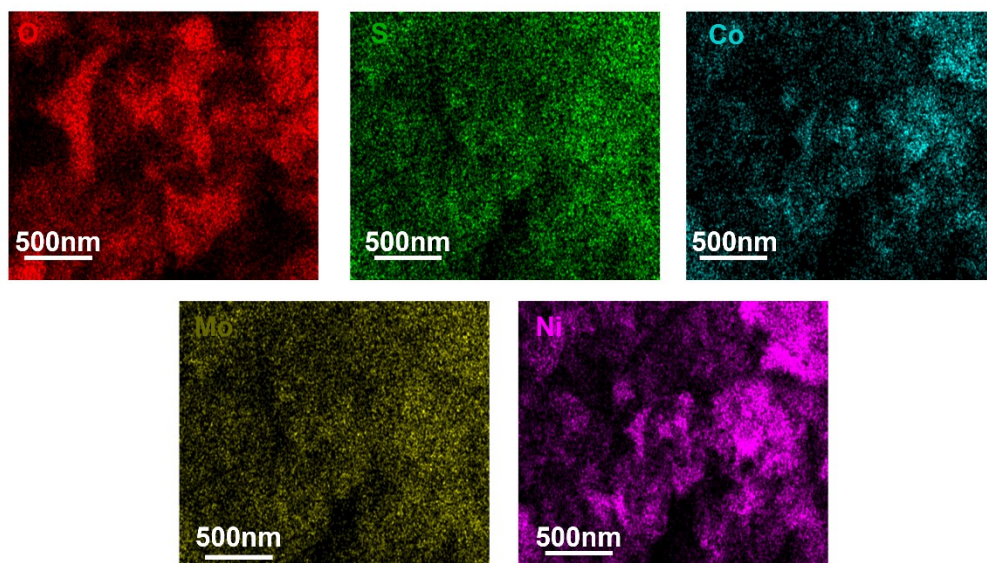

**Figure S16.** SEM image and the corresponding elemental mapping of  $\text{Ni}_3\text{S}_2/\text{CoMo}_2\text{S}_4/\text{NF}$  after the OER stability test.

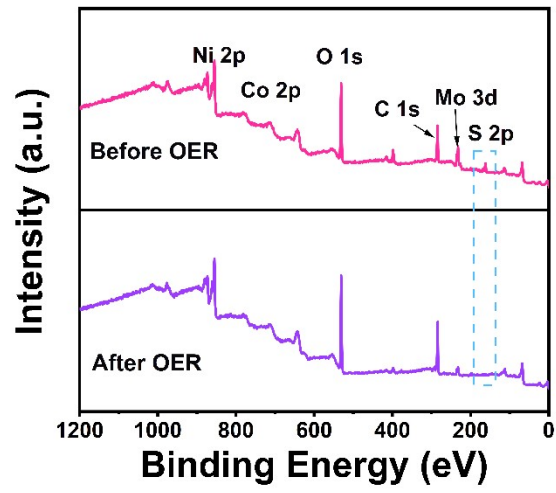

**Figure S17.** XPS spectra of Ni<sub>3</sub>S<sub>2</sub>/CoMo<sub>2</sub>S<sub>4</sub>/NF before and after the OER stability test.

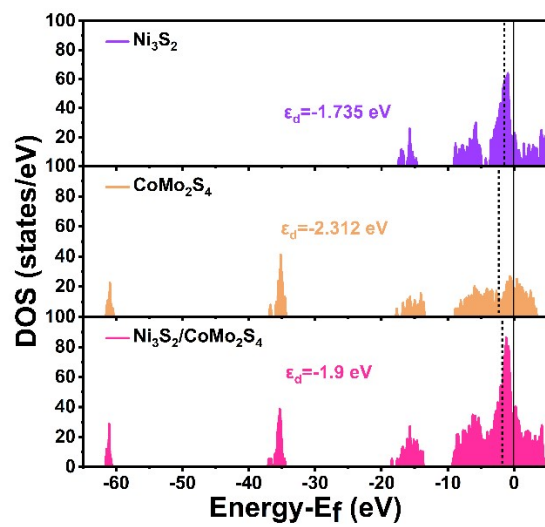

**Figure S18.** DOS plots of Ni<sub>3</sub>S<sub>2</sub>, CoMo<sub>2</sub>S<sub>4</sub> and Ni<sub>3</sub>S<sub>2</sub>/CoMo<sub>2</sub>S<sub>4</sub> during the OER.

**Table S1.** Elemental composition (Ni, Mo, Co and S) of Ni<sub>3</sub>S<sub>2</sub>/CoMo<sub>2</sub>S<sub>4</sub>/NF catalysts determined by ICP-OES.

| <b>Catalysts</b>                                                     | <b>ICP-OES</b>   |                  |                  |                 |                  |
|----------------------------------------------------------------------|------------------|------------------|------------------|-----------------|------------------|
|                                                                      | <b>Ni (at.%)</b> | <b>Mo (at.%)</b> | <b>Co (at.%)</b> | <b>S (at.%)</b> | <b>C\O(at.%)</b> |
| Ni <sub>3</sub> S <sub>2</sub> /CoMo <sub>2</sub> S <sub>4</sub> /NF | 77.3             | 5.81             | 1.2              | 6.22            | 9.01             |

**Table S2.** Comparison of the OER performance of Ni<sub>3</sub>S<sub>2</sub>/CoMo<sub>2</sub>S<sub>4</sub>/NF with previously reported electrocatalysts.

| Electrocatalyst                                                                | Substrate | $\eta_{100}$ (mV) | Tafel (mV dec <sup>-1</sup> ) | Ref.      |
|--------------------------------------------------------------------------------|-----------|-------------------|-------------------------------|-----------|
| Ni <sub>3</sub> S <sub>2</sub> /CoMo <sub>2</sub> S <sub>4</sub> /NF           | Ni foam   | 202               | 49                            | This work |
| Ce-FeS <sub>2</sub> /Ni <sub>3</sub> S <sub>2</sub>                            | Ni foam   | 330               | 100                           | 5         |
| Ni <sub>3</sub> S <sub>2</sub> -Fe <sub>5</sub> Ni <sub>4</sub> S <sub>8</sub> | NiFe foam | 240               | 48.1                          | 6         |
| NiFe/NF                                                                        | Ni foam   | 402               | 120                           | 7         |
| Ni <sub>3</sub> Se <sub>2</sub> /Ni <sub>3</sub> S <sub>2</sub> /NF            | Ni foam   | 312               | 145.54                        | 8         |
| Ni <sub>3</sub> S <sub>2</sub>                                                 | Ni foam   | 356               | 210.42                        | 9         |
| Ni <sub>3</sub> S <sub>2</sub> -W-Vs                                           | Ni foam   | 246               | 66                            | 10        |
| a-CoS/Ni <sub>3</sub> S <sub>2</sub>                                           | Ni foam   | 248               | 53                            | 11        |
| N-CoS <sub>2</sub>                                                             | Ni foam   | 292               | 55                            | 12        |
| CoNi <sub>2</sub> S <sub>4</sub> (CoNi <sub>2</sub> S <sub>4</sub> /Ni)        | Ni foam   | 328               | 160                           | 13        |
| FeCo-Ni <sub>3</sub> S <sub>4</sub>                                            | Ni foam   | 279               | 63.2                          | 14        |
| Ni <sub>x</sub> Sy@MnOxHy                                                      | Ni foam   | 326               | 39                            | 15        |
| PtFeCoNiCu                                                                     | Ni foam   | 264               | 84                            | 16        |
| MoS <sub>2</sub> @rGO                                                          | Ni foam   | 303               | 92                            | 17        |
| FeCoCuCrNi-MoS <sub>2</sub> -MoP                                               | Ni foam   | 234               | 103.9                         | 18        |
| CuNiCoS <sub>4</sub> /1T-MoS <sub>2</sub>                                      | Ni foam   | 230               | 126                           | 19        |

**Table S3.** Comparison of the HER performance of Ni<sub>3</sub>S<sub>2</sub>/CoMo<sub>2</sub>S<sub>4</sub>/NF with previously reported electrocatalysts.

| Electrocatalyst                                                      | Substrate    | $\eta_{10}$ (mV) | Tafel (mV dec <sup>-1</sup> ) | Ref.      |
|----------------------------------------------------------------------|--------------|------------------|-------------------------------|-----------|
| Ni <sub>3</sub> S <sub>2</sub> /CoMo <sub>2</sub> S <sub>4</sub> /NF | Ni foam      | 202              | 100                           | This work |
| CoMoS <sub>4</sub> /CC                                               | Carbon cloth | 143              | 105                           | 19        |
| Co <sub>3</sub> Mo <sub>2</sub> -LDH                                 | Ni foam      | 165              | 88                            | 20        |
| C@Mo <sub>2</sub> C/Co                                               | Carbon cloth | 145              | 90.7                          | 21        |
| CoMoS <sub>4</sub>                                                   | Ni foam      | 141              | 60.1                          | 22        |
| MoS <sub>2</sub> /NiS <sub>2</sub> /CoS <sub>2</sub>                 | Ni foam      | 101              | 116                           | 23        |
| MoS <sub>2</sub> /(CoNi@G)                                           | Ni foam      | 150              | 66                            | 24        |
| Mo-CoS <sub>2</sub> /NC                                              | Carbon cloth | 158              | 65                            | 25        |
| H-Fe-CoMoS                                                           | Carbon paper | 137              | 98                            | 26        |
| Cu-Ni <sub>3</sub> S <sub>2</sub>                                    | Ni foam      | 121              | 86.2                          | 27        |
| Co <sub>0.5</sub> MoS <sub>2</sub> /N                                | Ni foam      | 178              | 63.8                          | 28        |
| Fe-MoS <sub>2</sub> /CoMo <sub>2</sub> S <sub>4</sub>                | Carbon paper | 122              | 90                            | 29        |
| CoMo <sub>2</sub> S <sub>4</sub>                                     | Ni foam      | 162              | 116                           | 30        |

**Table S4.** Comparison of overall cell performance of Ni<sub>3</sub>S<sub>2</sub>/CoMo<sub>2</sub>S<sub>4</sub>/NF and previously reported electrocatalysts at a current density of 10 mA cm<sup>-2</sup>.

| <b>Electrocatalyst</b>                                               | <b>Cell voltage (V)</b> | <b>Ref.</b> |
|----------------------------------------------------------------------|-------------------------|-------------|
| Ni <sub>3</sub> S <sub>2</sub> /CoMo <sub>2</sub> S <sub>4</sub> /NF | 1.50                    | This work   |
| Pt-CoS <sub>2</sub> /CC                                              | 1.55                    | 31          |
| CS-NFO@PNC-700                                                       | 1.66                    | 32          |
| FeCoP/NF                                                             | 1.68                    | 33          |
| NiCo <sub>2</sub> S <sub>4</sub> NA/CC                               | 1.68                    | 34          |
| MoS <sub>2</sub> -Ni <sub>3</sub> S <sub>2</sub> HNRs/NF             | 1.52                    | 35          |
| CoSAs-MoS <sub>2</sub> /TiNNRs                                       | 1.65                    | 35          |
| NiFe-LDH/NiCo <sub>2</sub> O <sub>4</sub> /NF                        | 1.60                    | 36          |
| Ni/Mo <sub>2</sub> C-PC/NF                                           | 1.66                    | 37          |
| Co <sub>0.50</sub> Fe <sub>0.50</sub> S/rGO@NF                       | 1.66                    | 38          |
| FeCoNiCuPd/CC                                                        | 1.52                    | 39          |
| Co-P/NC/CC                                                           | 1.85                    | 40          |

## References:

- 1 G. Kresse and D. Joubert, *Phys. Rev. B.*, 1999, **59**, 1758-1775.
- 2 J. Perdew, K. Burk and M. Ernzerhof, *Phys. Rev. Lett.*, 1996, **77**, 3865-3868.
- 3 S. Grimme, J. Antony, S. Ehrlich and H Krieg, *J. Chem. Phys.*, 2010, **132**,154104.
- 4 R. Ren, J. Wang, Y. Xie, T. Li, H. Wei, F. Wang, H. Yang, Z. Lin and J. Gao, *Appl. Catal. B-Environ.*, 2026, **388**, 126543.
- 5 Y. He, K. Shi, X. Wang, X. Zheng, L. Luo, L. Lin, Z. Sun and G. Sun, *Inorg. Chem. Front.*, 2024, **21**, 7623-7632.
- 6 Y. Wu, Y. Li, Z. Lü, L. Xu and B. Wei, *J. Mater. Sci.*, 2020, **55**, 15963-15974.
- 7 Y. Wu, R. Su, Y. Li, Z. Wang, Z. Lü, L. Xu and B. Wei, *Electrochim. Acta.*, 2019, **309**, 415-423.
- 8 M. Lin, M. Gu, X. Deng, Q. Xi and X. Zhan, *Chem. Eng. J.*, 2023, **468**, 143705.
- 9 Z. Wang, S. Shen, Z. Lin, W. Tao, Q. Zhang, F. Meng, L. Gu and W. Zhong, *Adv. Funct. Mater.*, 2022, **32**, 2112832.
- 10 W. Luo, Y. Yu, Y. Wu, W. Wang, Y. Jiang, W. Shen, R. He, W. Su and M. Li, *Small.*, 2024, **20**, 2310387.
- 11 W. Zhang, W. Chen, Q. Xiao, L. Yu, C. Huang, G. Lu, A. Morawski and Y. Yu, *Appl. Catal. B-Environ.*, 2020, **268**, 118449.
- 12 J. Li, Q. Zhuang, P. Xu, D. Zhang, L. Wei and D. Yuan, *Chin. J. Catal.*, 2018, **39**, 1403-1410.
- 13 X. Mao, Y. Liu, Z. Chen, Y. Fan and P. Shen, *Chem. Eng. J.*, 2022, **427**, 130742.
- 14 P. Wang, Y. Luo, G. Zhang, Z. Chen, H. Ranganathan, S. Sun and Z. Shi, *Nano-Micro Lett.*, 2022, **14**, 120.
- 15 S. Maria, N. Jeghan, J. Kim and G. Lee, *APPL SURF SCI.*, 2021, **546**, 149072.
- 16 F. Wang, S. Chen, Z. Tong, X. Liu, H. Zhou, Y. He, G. Shu, Y. Jin and W. Zheng, *ACS Appl. Mater. Interfaces.*, 2025, **49**, 66617-66629.
- 17 U. Afreen, U. Afreen and N. K. Singh, *J. Mater. Chem. A.*, 2025, **15**, 10945-10966.
- 18 G. Amarjeet, M. Karthick, T. S. Kumar, S. Prabu, M. Vinu and T, *Int. J. Hydrogen Energy.*, 2026, **203**, 153124.
- 19 J. Shen, Y. Liu, Q. Chen, W. Yu and Q. Zhong, *J. Colloid Interface Sci.*, 2024, **658**, 1009-1015.
- 20 L. Xia, X. Zhang, H. Song, Y. Zheng, X. Li, B. Gao, K. Huo and P. Chu, *J. Hydrogen Energy.*, 2020, **45**, 22629-22637.
- 21 A. Yadav, Y. Hunge and S. Kang, *Ultrason. Sonochem.*, 2021, **72**, 105454.
- 22 Z. Yin, X. Liu, S. Chen, H. Xie, L. Gao, A. Liu, T. M and Y. Li, *Mater. Today Nano.*, 2022, **17**, 100156.
- 23 Y. Tu, J. Deng, C. Ma, L. Yu, X. Bao and D. Deng, *Nano Energy.*, 2020, **72**, 104700.
- 24 L. Zhao, C. Gong, X. Chen, X. He, H. Chen, X. Du, D. Wang, W. Fang, H. Zhang and W. Li, *APPL SURF SCI.*, 2023, **623**, 157030.
- 25 Y. Guo, X. Zhou, J. Tang, S. Tanaka, Y. Kaneti, J. Na, B. Jiang, Y. Yamauchi, Y. Bando and Y. Sugahara, *Nano Energy.*, 2020, **75**, 10491.

- 26 L. Zhang, X. Gao, Y. Zhu, A. Liu, H. Dong, D. Wu, Z. Han, W. Wang, Y. Fang, J. Zhang, Z. Kou, B. Qian and T. Wang, *Nanoscale.*, 2021, **13**, 2456-2464.
- 27 S. Selem, H. Hasaniena and A. El - Fergany, *Int. J. Energy Res.*, 2020, **44**, 4629-4640.
- 28 Y. Guo, J. Tang, J. Henzie, B. Jiang, W. Xia, T. Chen, Y. Bando, Y. Kang, M. Hossain, Y. Sugahara and Y. Yamauchi, *ACS Nano.*, 2020, **14**, 4141-4152.
- 29 H. Wang, X. Li, N. Qin, X. Zhao, H. Cheng, G. Cao and W. Zhang, *J. Mater. Chem. A.*, 2019, **7**, 12068-12074.
- 30 X. Han, X. Wu, Y. Deng, J. Liu, J. Lu, C. Zhong and W. Hu, *Adv. Energy Mater.*, 2018, **8**, 1800935.
- 31 S. Ramakrishnan, D. Velusamy, S. Sengodan, G. Nagaraju, D. Kim, A. Kim and D. Yoo, *Appl. Catal. B-Environ.*, 2022, **300**, 120752.
- 32 K. Sun, K. Wang, T. Yu, X. Liu, G. Wang, L. Jiang, Y. Bu and G. Xie, *Int. J. Hydrog. Energy.*, 2019, **44**, 1328-1335.
- 33 D. Liu, Q. Lu, Y. Luo, X. Sun and A. Asiri, *Nanoscale.*, 2015, **7**, 15122-15126.
- 34 Y. Yang, K. Zhang, H. Lin, X. Li, H. Chan, L. Yang and Q. Gao, *ACS Catal.*, 2017, **7**, 2357-2366.
- 35 T. Doan, D. Nguyen, S. Prabhakaran, D. Kim, D. Tran, N. Kim and J. Lee, *Adv. Funct. Mater.*, 2021, **31**, 2100233.
- 36 Z. Wang, S. Zeng, W. Liu, X. Wang, Q. Li, Z. Zhao and F. Geng, *ACS Appl. Mater. Interfaces.*, 2017, **9**, 1488-1495.
- 37 Z. Yu, Y. Duan, M. Gao, C. Lang, Y. Zheng and S. Yu, *Chem. Sci.*, 2017, **8**, 968-973.
- 38 K. Zhang, P. Jiang, Q. Gu, Y. Leng, P. Zhang, Z. Li and Y. Li, *Int. J. Energy Res.*, 2022, **46**, 7320-7333.
- 39 Y. Liao, R. Zhu, W. Zhang, H. Zhu, Y. Sun, J. Chen, Z. Dong and R. Lv, *Nano Res.*, 2024, **17**, 3379-3389.
- 40 X. Liu, J. Dong, B. You and Y. Sun, *RSC Adv.*, 2016, **6**, 73336-73342.
